# Supplementary material for: Irreversible Electroporation Combined with Checkpoint Blockade and TLR7 Stimulation Induces Antitumor Immunity in a Murine Pancreatic Cancer Model
Source: Oxford University Press journal article supplement (doi:10.1158/2326-6066.cir-19-0101), 2019-08-13
Supplement: 23266066cir190101-sup-216980_3_supp_5702233_pvzc6k.xlsx [file 23266066cir190101-sup-216980_3_supp_5702233_pvzc6k.xlsx]

## Sheet: Sheet1
KPC	101	Peptide No	mut_20mer	' || a.gene_name	Mut_pos_in_peptide	Pools	Peptide Concentration
44 mutations and 101 peptides (including transcripts)	2mg Crude	3960	KQCGKCPDGEPAFRVKAGLQ	'2810021J22Rik	15	Pool 1	40mg/ml
	crude	3960	EPAFRVKAGLQHTLHSWGKP	'2810021J22Rik	6	4mg/ml	40mg/ml
	20 mers	3960	SGAKVYVYTSQPGRSDLTVP	'4933427D14Rik	15		40mg/ml
		3960	SQPGRSDLTVPNSPPTHDPG	'4933427D14Rik	6		40mg/ml
	Mut_pos_in_peptide (6 or 15)	3960	RLLEAWQKQQNQASGSQTAT	'Abcc3	15		40mg/ml
		3960	QNQASGSQTATAEPKIPGED	'Abcc3	6		40mg/ml
		3960	AYLDSEQRLMAARVIKRFIL	'Abce1	15		40mg/ml
		3960	MAARVIKRFILHAKKTAFVV	'Abce1	6		40mg/ml
		3960	VDGKEESEYSVKWQDFFSGH	'Adam17	15		40mg/ml
		3960	SVKWQDFFSGHVVGEPDSRV	'Adam17	6		40mg/ml
		3960	DSCTETISSSGDKAITPPLP	'Akap1	15	Pool 2	40mg/ml
		3960	SGDKAITPPLPVSTQPFSNG	'Akap1	6	4mg/ml	40mg/ml
		3960	ERLVYISFRQGLLTDTGLSL	'Car12	15		40mg/ml
		3960	QGLLTDTGLSLGIILSVALA	'Car12	6		40mg/ml
		3960	SSPFLSKRSLSRSPIPRKSM	'Cdk12	15		40mg/ml
		3960	SSPFLSKRSLSRSPIPSRKS	'Cdk12	15		40mg/ml
		3960	LSRSPIPRKSMKSRSRSPAY	'Cdk12	6		40mg/ml
		3960	LSRSPIPSRKSMKSRSRSPA	'Cdk12	6		40mg/ml
		3960	GSSSFSSQGGSSSFISHGGS	'Cdsn	15		40mg/ml
		3960	GSSSFISHGGSSSSQGSSSG	'Cdsn	6		40mg/ml
		3960	HDESVVLHRTADEGVGSSCP	'Cep162	15	Pool 3	40mg/ml
		3960	TADEGVGSSCPATEEHLDKM	'Cep162	6	4mg/ml	40mg/ml
		3960	LDEITSGKGKMAEKDRSRLL	'Cep55	15		40mg/ml
		3960	KMAEKDRSRLLEKIQVLEAE	'Cep55	6		40mg/ml
		3960	GEQGLIGQRGEPGLDGDHGP	'Col27a1	15		40mg/ml
		3960	GEPGLDGDHGPVGPDGLKGD	'Col27a1	6		40mg/ml
		3960	DTLPRDVTDTLPREGLSSPS	'Cyb5r4	15		40mg/ml
		3960	TLPREGLSSPSYDWFQTESS	'Cyb5r4	6		40mg/ml
		3960	IKAQKGAAFLAITTVYAESG	'Decr1	15		40mg/ml
		3960	LAITTVYAESGSGFVMPSSS	'Decr1	6		40mg/ml
		3960	QKGLPRQVFESDEASDGSSY	'Dock7	15	Pool 4	40mg/ml
		3960	ESDEASDGSSYQDEQDDLKR	'Dock7	6	4mg/ml	40mg/ml
		3960	NFTKEITDLFAQLHISSRPE	'Fam114a2	15		40mg/ml
		3960	FAQLHISSRPEKLARARNTA	'Fam114a2	6		40mg/ml
		3960	RTRMLGASAATGDVITFLDS	'Galnt10	15		40mg/ml
		3960	ATGDVITFLDSHCEANVNWL	'Galnt10	6		40mg/ml
		3960	IYVHNLKAVLESNPDSPITI	'Gemin5	15		40mg/ml
		3960	LESNPDSPITITEPYRTLSG	'Gemin5	6		40mg/ml
		3960	EGEVQAFYEDLSGRRYVNEV	'Gramd1b	15		40mg/ml
		3960	DLSGRRYVNEVFNFSVDKLY	'Gramd1b	6		40mg/ml
		3960	ITLTWQKDGEELTQDVEFVE	'H2-T10	15	Pool 5	40mg/ml
		3960	EELTQDVEFVETRPAGDGTF	'H2-T10	6	4mg/ml	40mg/ml
		3960	TWRESHSDNSSAMEQWKNKN	'H60b	15		40mg/ml
		3960	SSAMEQWKNKNLEKDIRNVL	'H60b	6		40mg/ml
		3960	RCLNKLSPHFREMPESKIKV	'H60b	15		40mg/ml
		3960	FREMPESKIKVLDTTQNTNT	'H60b	6		40mg/ml
		3960	NFTVAAQTALDDARVFLTDL	'Hfe2	15		40mg/ml
		3960	LDDARVFLTDLENLHLFPSD	'Hfe2	6		40mg/ml
		3960	TARRDLSPRRERRYLTTIRA	'Hivep2	15		20mg/ml
		3960.01	RERRYLTTIRAPSPRRALYP	'Hivep2	6		20mg/ml
		3960.01	SVQHPVTKSATRRIIHANTK	'Hmgxb3	15	Pool 6	20mg/ml
		3960.01	ATRRIIHANTKPDPSDPSAG	'Hmgxb3	6	4mg/ml	20mg/ml
		3960.01	HVVMEAIQELMTKDAPDSLS	'Hook2	15		20mg/ml
		3960.01	LMTKDAPDSLSPENYGNFDT	'Hook2	6		20mg/ml
		3960.01	RTTGQMVAPSLSPNKKMSSE	'Hps1	15		20mg/ml
		3960.01	SLSPNKKMSSELGKGPLAAF	'Hps1	6		20mg/ml
		3960.01	HLSVIPTDLLVQQAGQLARR	'Hps1	15		20mg/ml
		3960.01	LVQQAGQLARRLGEASRVTL	'Hps1	6		20mg/ml
		3960.01	WTDEEFAESLRLKLRQSEDE	'Hps1	15		20mg/ml
		3960.01	LRLKLRQSEDEEEELPVLED	'Hps1	6		20mg/ml
		3960.01	STLLAPVIISSMTMLEKLSD	'Hps1	15	Pool 7	20mg/ml
		3960.01	SSMTMLEKLSDTYTCFSTEN	'Hps1	6	4mg/ml	20mg/ml
		3960.01	LELMMCFAVNKFLRVLESSW	'Igtp	15		20mg/ml
		3960.01	NKFLRVLESSWWYGLWNVVT	'Igtp	6		20mg/ml
		3960.01	LESTENTLQEATSSMSLMTQ	'Ikbip	15		20mg/ml
		3960.01	EATSSMSLMTQFEQEVSGLQ	'Ikbip	6		20mg/ml
		3960.01	QNITDFWKRTLAEMSDDTAV	'Ikbip	15		20mg/ml
		3960.01	TLAEMSDDTAVFKSEVKDTH	'Ikbip	6		20mg/ml
		3960.01	FEYFSDAVFIPKDGDTLSVG	'Irgm2	15		20mg/ml
		3960.01	IPKDGDTLSVGVIKRIETAV	'Irgm2	6		20mg/ml
		3960.01	PSYKGDVSDPKAAGPGAQGR	'Itpr3	15	Poool 8	20mg/ml
		3960.01	PKAAGPGAQGRTGRRNAGEK	'Itpr3	6	4mg/ml	20mg/ml
		3960.01	KCVKGQPHDHKHLMPTQIIP	'Jmjd1c	15		40mg/ml
		3960.01	HKHLMPTQIIPGSVLTDLLD	'Jmjd1c	6		40mg/ml
		3960.01	GGKNNEKSDAPKAKAEQDSE	'Lactb	15		40mg/ml
		3960.01	APKAKAEQDSEARCRSAKPG	'Lactb	6		40mg/ml
		3960.01	RSPARDTQHHLAIFHLDSEA	'Lama5	15		40mg/ml
		3960.01	HLAIFHLDSEASIRLTAEQA	'Lama5	6		40mg/ml
		3960.01	PQSSGTKKLRLVGPADRPEE	'Loxl4	15		40mg/ml
		3960.01	RLVGPADRPEEGRLEVLHQG	'Loxl4	6		40mg/ml
		3960.01	NSTTTIPPITNTSLASVTRP	'Lypd8	15	Pool 9	40mg/ml
		3960.01	TNTSLASVTRPGIKTSPASV	'Lypd8	6	4mg/ml	40mg/ml
		3960.01	VPGPTFFRQQDGLLRGGYEA	'Lzts2	15		40mg/ml
		3960.01	QDGLLRGGYEAQEPLCPAVP	'Lzts2	6		40mg/ml
		3960.01	RPGLSLAGVGHKGADVAEVM	'Mdn1	15		40mg/ml
		3960.01	GHKGADVAEVMLAFITWLTR	'Mdn1	6		40mg/ml
		3960.01	STNSSNHPMSSKHNMSGGEF	'Med1	15		40mg/ml
		3960.01	SSKHNMSGGEFQSKREKSDK	'Med1	6		40mg/ml
		3960.01	EKIQNNSKLLRNKAIQLESE	'Mfn1	15		40mg/ml
		3960.01	LRNKAIQLESELENFSKQFL	'Mfn1	6		40mg/ml
		3960.01	QQELGNSSINGSKSGTTRAG	'Mrps10	15	Pool 10	40mg/ml
		3960.01	NGSKSGTTRAGGLALSASMK	'Mrps10	6	3.64 mg/ml	40mg/ml
		3960.01	NGSKSGTTRAGGLALASMKW	'Mrps10	6		40mg/ml
		3960.01	EVNLLRELKHPNIVRYYDRI	'Nek2	15		40mg/ml
		3960.01	HPNIVRYYDRIIDRTNTTLY	'Nek2	6		40mg/ml
		3960.01	TEYAVSDEANPHMPASPVKC	'Parpbp	15		40mg/ml
		3960.01	NPHMPASPVKCSQNDEQVRV	'Parpbp	6		40mg/ml
		3960.01	ETAATEIVEKLYDDVMEAVP	'Pars2	15		40mg/ml
		3960.01	KLYDDVMEAVPQLRGEVLLD	'Pars2	6		40mg/ml
		3960.01	LSVNPKRVNKVLSAEALRPG	'Pdcd11	15		40mg/ml
		3960.01	KVLSAEALRPGMLLTGTVSS	'Pdcd11	6		40mg/ml
